# Supplementary material for: Solid-state thermal conversion of a nanoporous metal–organic framework to a nonporous coordination polymer
Source: Royal Society of Chemistry journal article supplement (doi:10.1039/c5ra08350h), 2015-01-01
Supplement: c5ra08350h1.pdf [file c5ra08350h1.pdf]

**Electronic Supplementary Information**

**Solid-state Thermal Conversion of a Nanoporous Metal-Organic Framework  
to a Nonporous Coordination polymer**

**Fatemeh Shahangi Shirazi and Kamran Akhbari\***

<sup>1</sup>School of Chemistry, College of Science, University of Tehran, P.O. Box 14155-6455, Tehran,  
Islamic Republic of Iran.

### **Synthesis of $[\text{Zn}_2(\text{BDC})_2(\text{H}_2\text{O})_2 \cdot (\text{DMF})_2]_n$ ( $3 \cdot 2\text{H}_2\text{O} \cdot 2\text{DMF}$ ) metal-organic framework.**

White powder of  $[\text{Zn}_2(\text{BDC})_2(\text{H}_2\text{O})_2 \cdot (\text{DMF})_2]_n$  ( $3 \cdot 2\text{H}_2\text{O} \cdot 2\text{DMF}$ ) was synthesized by dissolving 5 mmol (0.831 g) benzene-1,4-dicarboxylic acid ( $\text{H}_2\text{BDC}$ ) and 5 mmol (1.485 g)  $\text{Zn}(\text{NO}_3)_2 \cdot 6\text{H}_2\text{O}$  in 40 mL DMF. The resulting mixture was refluxing at 150 °C for 8 hours. 4 hours after beginning of the reflux reaction, white precipitate was formed. After filtering, the white precipitate was washed with DMF, and dried at room temperature for 2 days, d.p. = above 300 °C, yield: 1.433 g, 89.4 % based on final product, IR (selected bands; in  $\text{cm}^{-1}$ ): 543 m, 678 w, 749 s, 826 m, 1016 w, 1108 m, 1385 vs, 1603 vs, 1658 vs and 2700-3700 br. Anal. calc. For  $\text{C}_{11}\text{H}_{13}\text{NO}_6\text{Zn}$ : C, 41.21; H, 4.09; N, 4.37 found; C, 41.33; H, 3.95; N, 4.25 %. A Comparison between the XRD patterns simulated from single crystal X-ray data (Figure S7a) and that of the prepared powder (Figure S7b), approved the formation of  $[\text{Zn}_2(\text{BDC})_2(\text{H}_2\text{O})_2 \cdot (\text{DMF})_2]_n$  ( $3 \cdot 2\text{H}_2\text{O} \cdot 2\text{DMF}$ ).

### **Preparation apohost framework of $[\text{Zn}_2(\text{BDC})_2]_n$ (**3**) by removal of guest DMF and coordinated water molecules.**

White powder of  $[\text{Zn}_2(\text{BDC})_2]_n$  (**3**) was prepared by heating half of the  $3 \cdot 2\text{H}_2\text{O} \cdot 2\text{DMF}$  powder at 180 °C for 8 hours. d.p. = above 300 °C, IR (selected bands; in  $\text{cm}^{-1}$ ): 545 m, 678 w, 750 s, 820 m, 1020 w, 1382 vs and 1660 vs. Anal. calc. For  $\text{C}_8\text{H}_4\text{O}_4\text{Zn}$ : C, 41.87; H, 1.76; N, 0.00 found; C, 42.01; H, 1.81; N, 0.11 %. XRD pattern of the resulting powder (Figure S7c) approximately matches with the simulated XRD pattern from single crystal X-ray data (Figure S7a). The differences between these two patterns is due to removal of DMF and coordinated  $\text{H}_2\text{O}$  molecules which can be considered as a template in formation of  $3 \cdot 2\text{H}_2\text{O} \cdot 2\text{DMF}$ . Other studies such as gas adsorption analyses<sup>1,2</sup> were approved that the structure of compound **3** does not change or collapse during thermal treatment of  $3 \cdot 2\text{H}_2\text{O} \cdot 2\text{DMF}$  at 180 °C.

#### References:

1. H. L. Li, M. Eddaoudi, T. L. Groy, O. M. Yaghi, J. Am. Chem. Soc. 1998, 120, 8571.
2. Z. Chen, S. Xiang, D. Zhao, B. Chen, Cryst. Growth Des. 2009, 9, 5293.

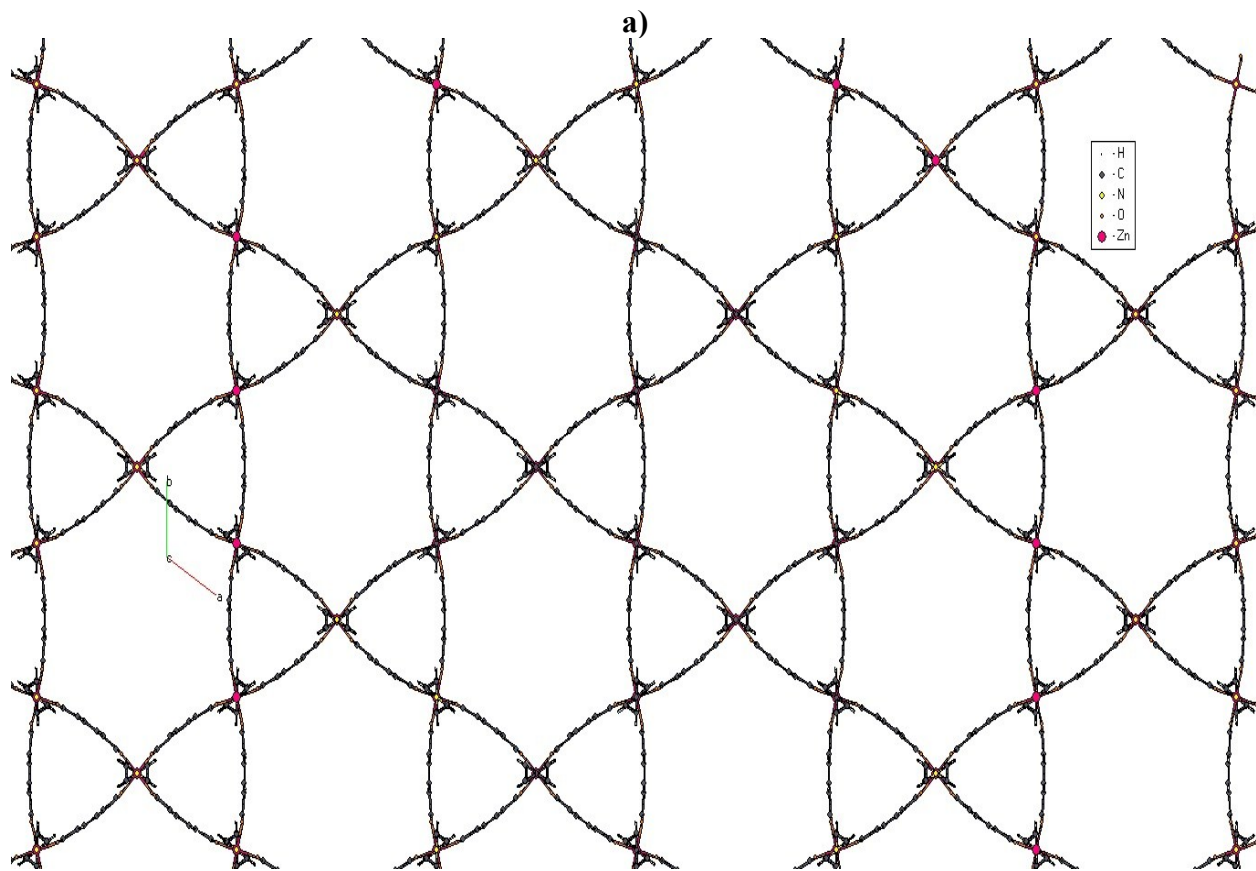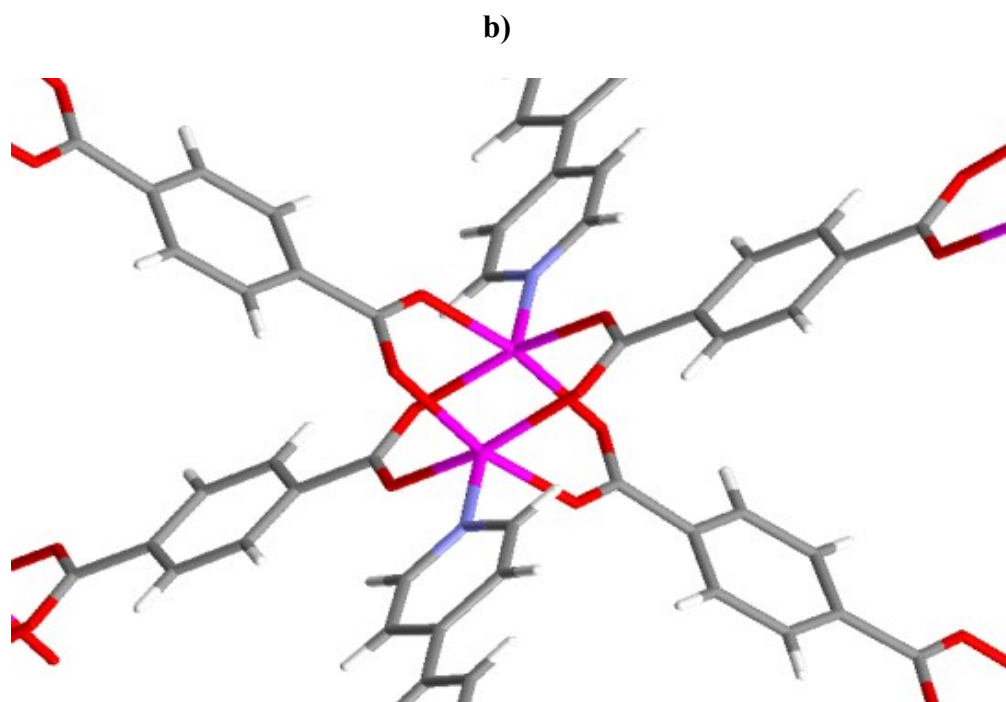

c)

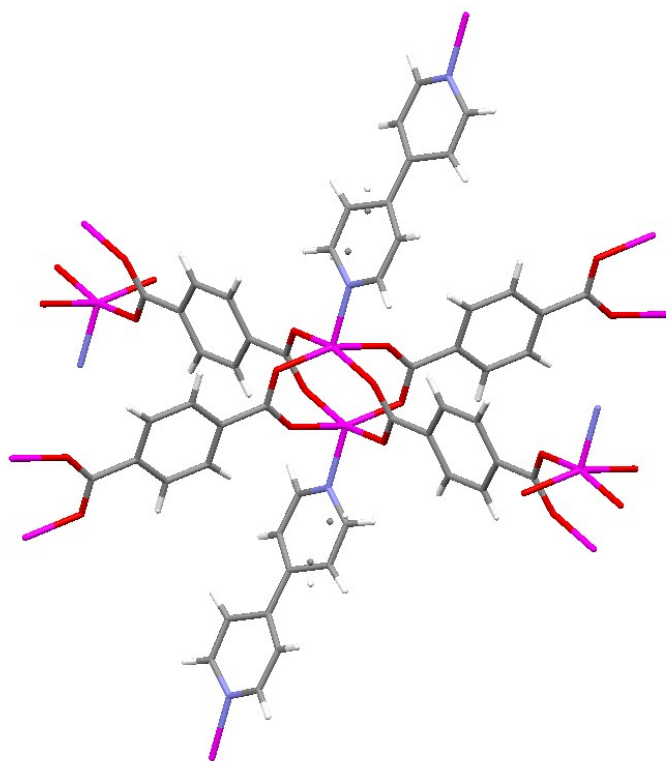

d)

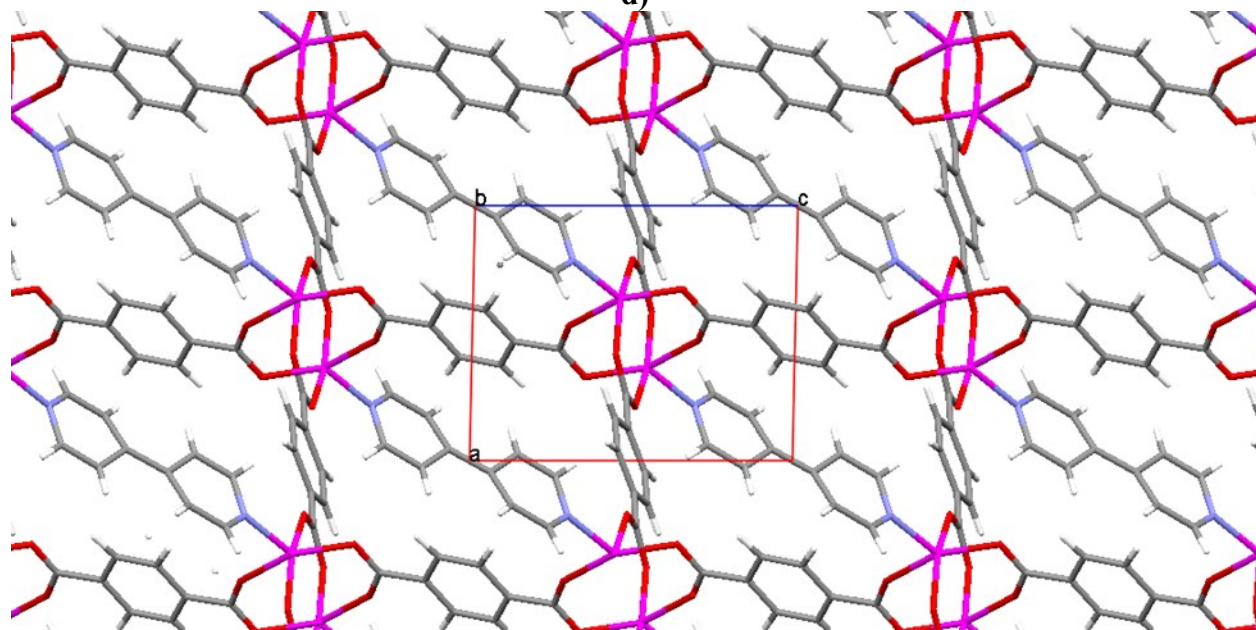

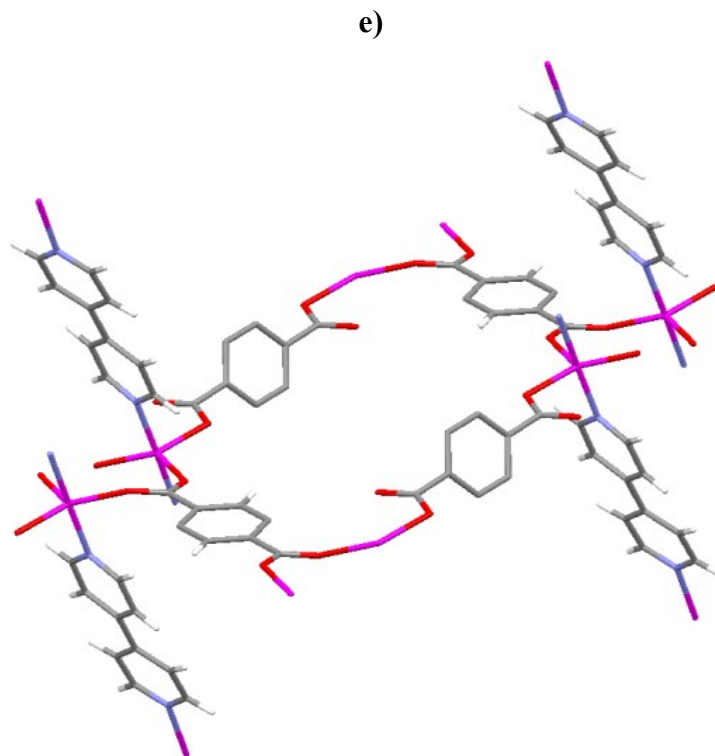

**Figure S1.** a) A fragment of  $\text{Zn}(\text{BDC})(4,4'\text{-Bipy})_{0.5}$  MOF with pillared 2D Kagomé net; b) MOF-508a (**1**.DMF.H<sub>2</sub>O) primary structural building unit; c) guest-free phase of MOF-508b (**1**) primary structural building unit, d) a fragment of the apohost framework of **1** along the crystallographic *b* axis and e) primary structural building unit of **2** (Zn= violet, O = red, C = gray, N = blue and H = white).

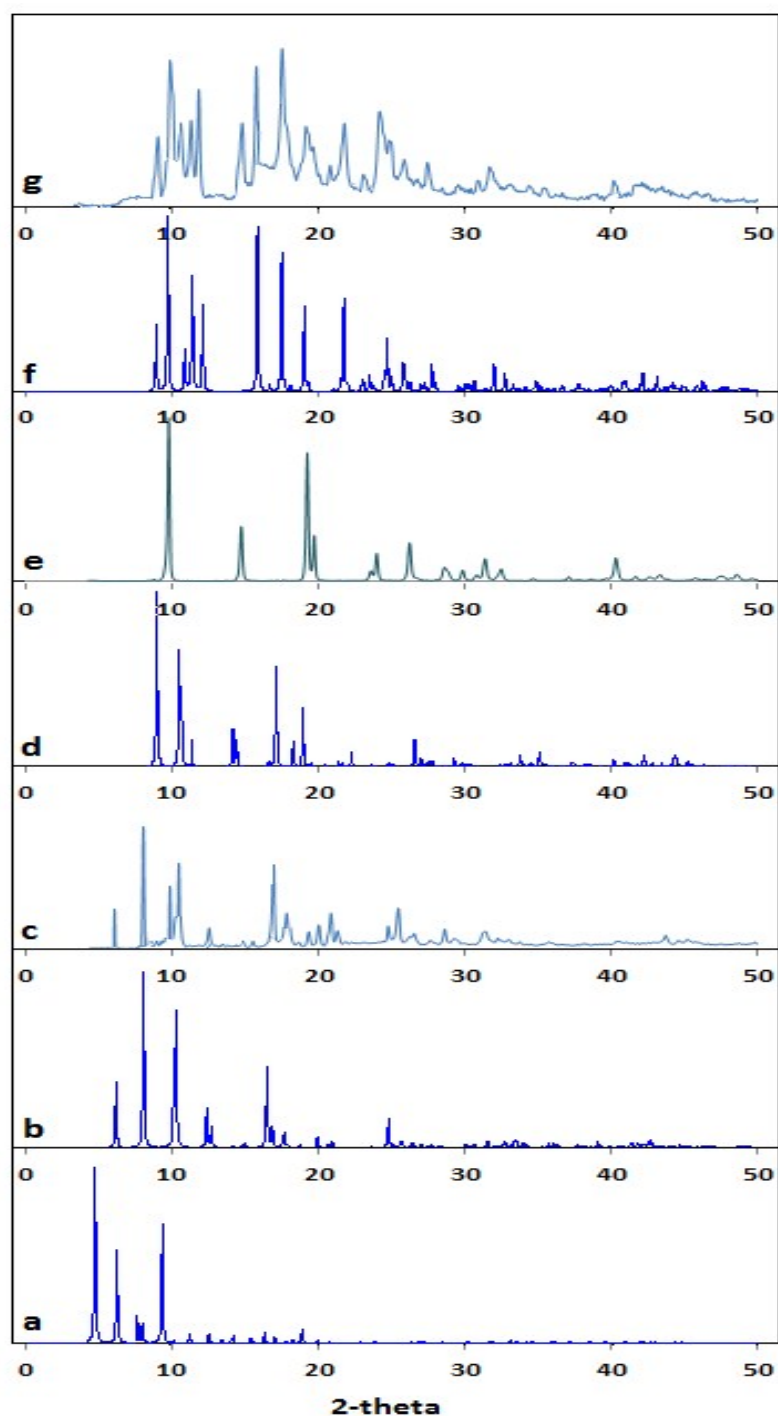

**Figure S2.** XRD patterns; a) simulated pattern based on single crystal data of compound  $\text{Zn}(\text{BDC})(4,4'\text{-Bipy})_{0.5} \cdot (\text{DMF})(\text{H}_2\text{O})_{0.5}$  (1.DMF.H<sub>2</sub>O) with pillared 2D Kagomé network, b) simulated pattern based on single crystal data of compound 1.DMF.H<sub>2</sub>O with pillared 2D square-grid network, c) microrods of 1.DMF.H<sub>2</sub>O prepared under reflux condition, d) simulated pattern based on single crystal data of guest-free phase of MOF-508b (1), e) the apohost framework of Zn(BDC) (3), f) simulated pattern based on single crystal data of compound  $\text{Zn}(\text{BDC})(4,4'\text{-Bipy})$  (2) and g) the obtained powder after thermal treatment of 1.DMF.H<sub>2</sub>O at 350 °C.

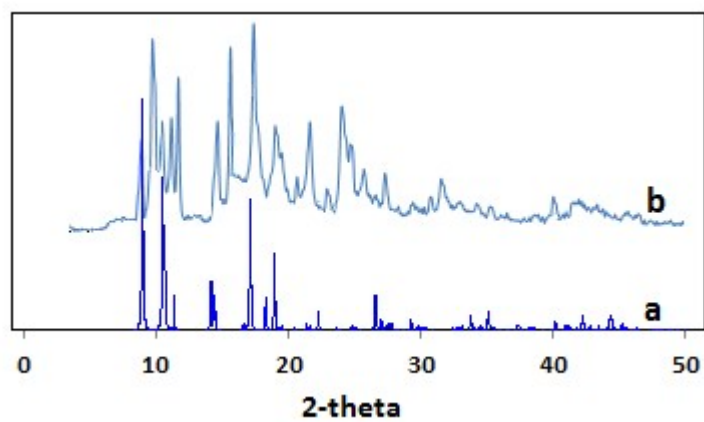

**Figure S3.** XRD patterns; a) simulated pattern based on single crystal data of guest-free phase of MOF-508b (**1**) and b) the obtained powder after thermal treatment of **1**.DMF.H<sub>2</sub>O at 350 °C.

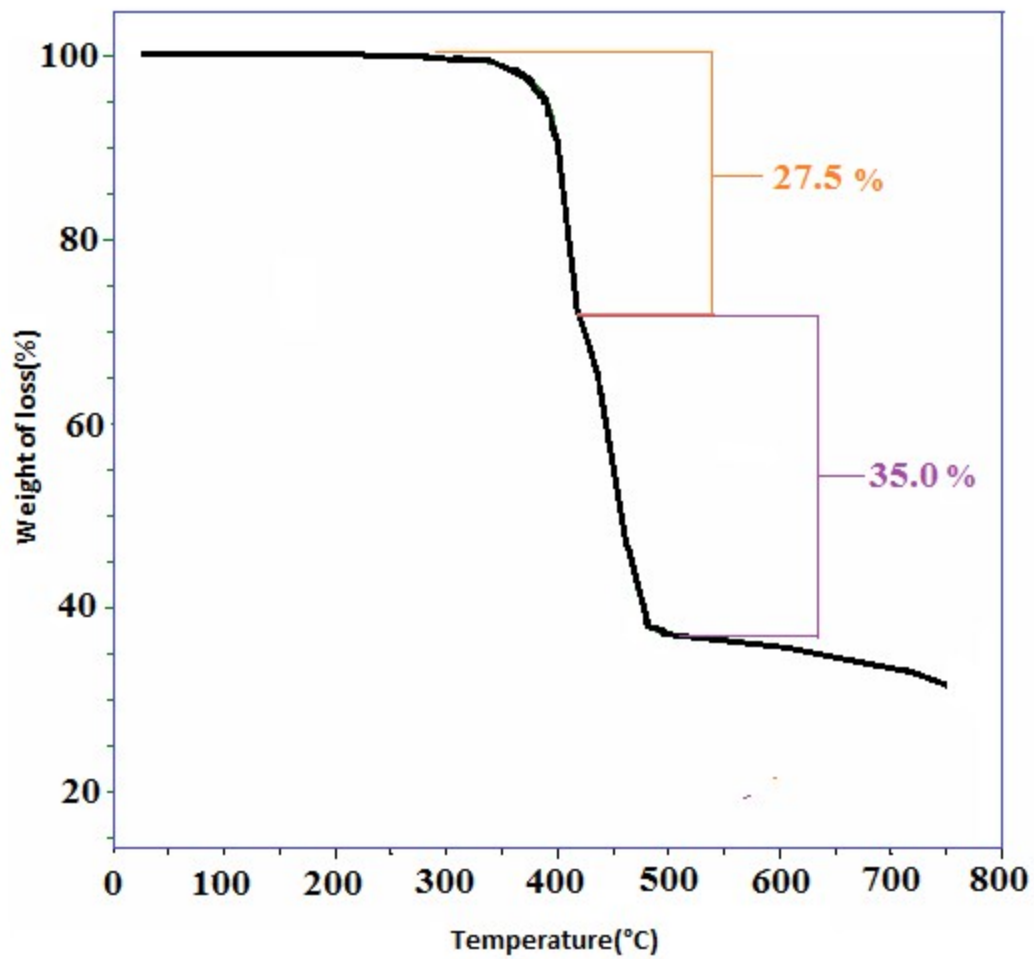

**Figure S4.** Thermal behaviour of compounds 2;3 mixture.



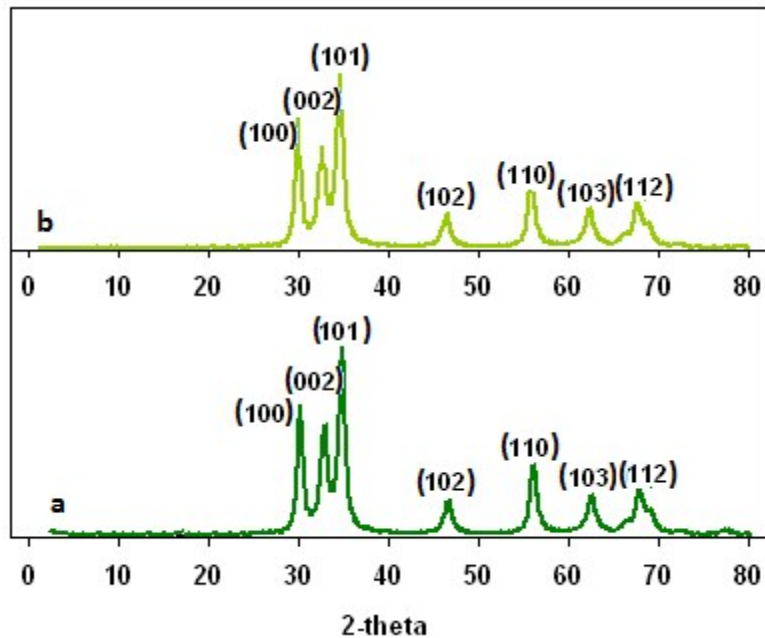

**Figure S5.** XRD patterns; a) ZnO nanoparticles, fabricated from calcination process of 1.DMF.H<sub>2</sub>O microrods at 550 °C and b) agglomerated nanoparticles of ZnO fabricated from calcination process of compounds 2 and 3 microrods at 550 °C.

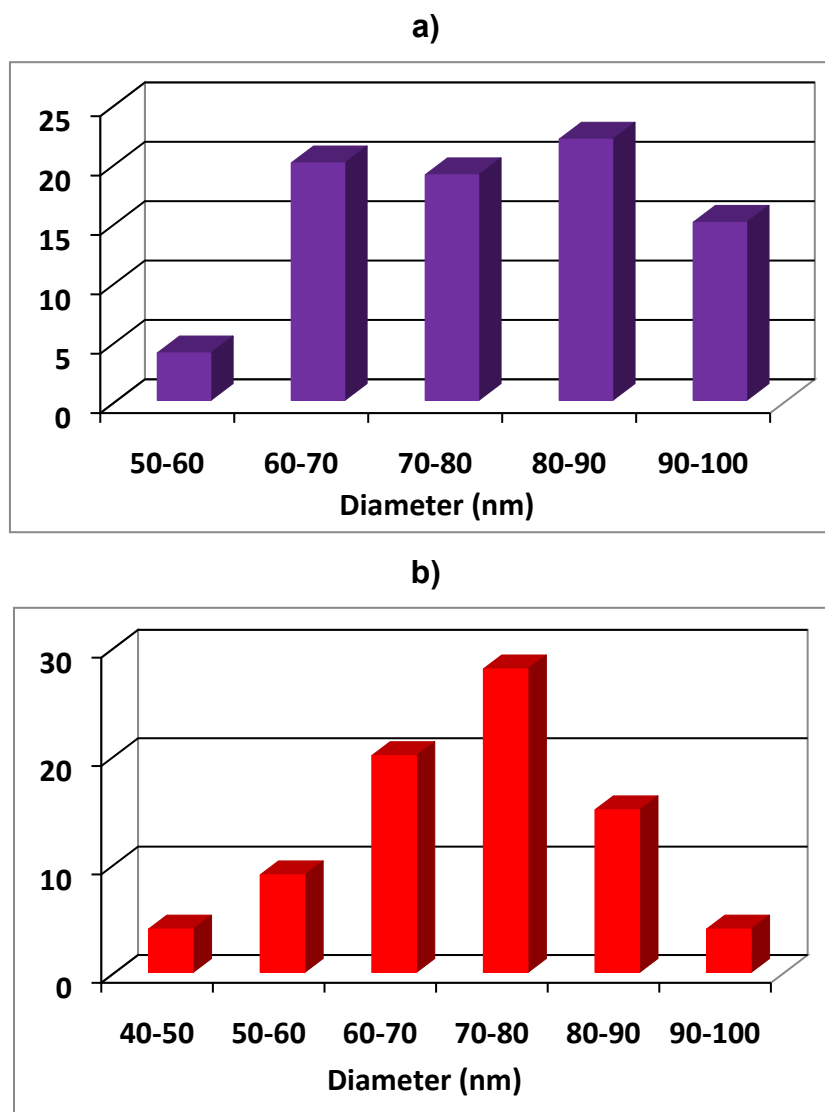

**Figure S6.** The corresponding particle size distribution histograms of ZnO nanoparticles fabricated from calcination process of a) 1.DMF.H<sub>2</sub>O microrods and b) compounds 2 and 3 microrods.

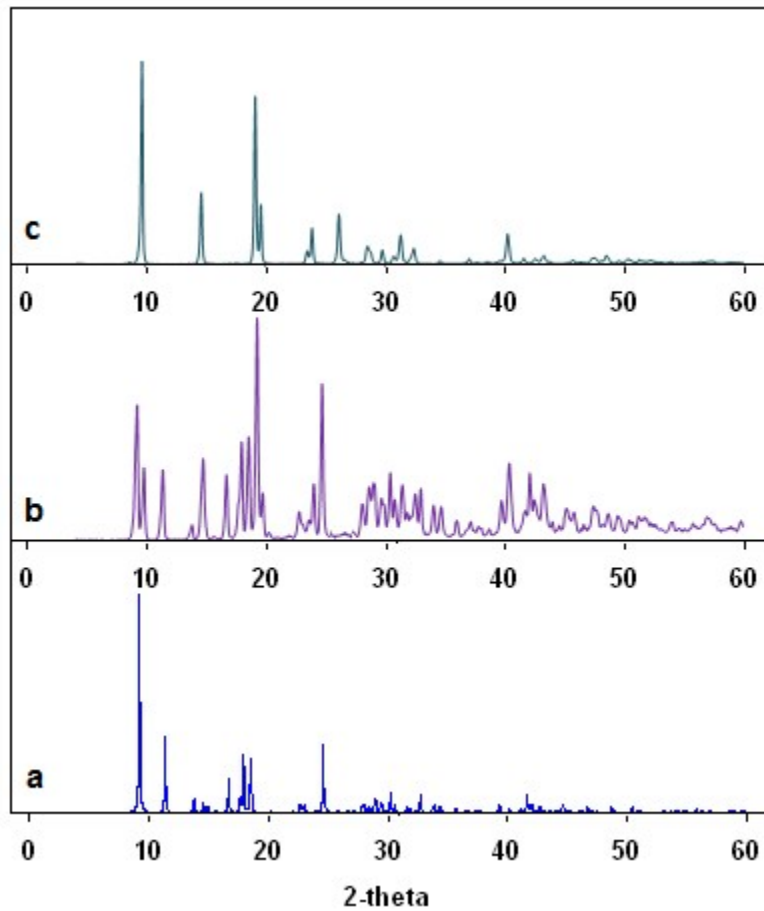

**Figure S7.** XRD patterns; a) simulated pattern based on single crystal data of compound  $[\text{Zn}_2(\text{BDC})_2(\text{H}_2\text{O})_2 \cdot (\text{DMF})_2]_n$  ( $\mathbf{3} \cdot 2\text{H}_2\text{O} \cdot 2\text{DMF}$ ), b) white precipitate of  $\mathbf{3} \cdot 2\text{H}_2\text{O} \cdot 2\text{DMF}$  and c) apohost framework of  $\mathbf{3}$ .
